# Supplementary material
Source: publisher site journal article supplement (https://www.dovepress.com/article/515049)
Supplement: Supplementary file 1 [file get_supplementary_file.php]

Supplementary Material

## Supplementary Figures


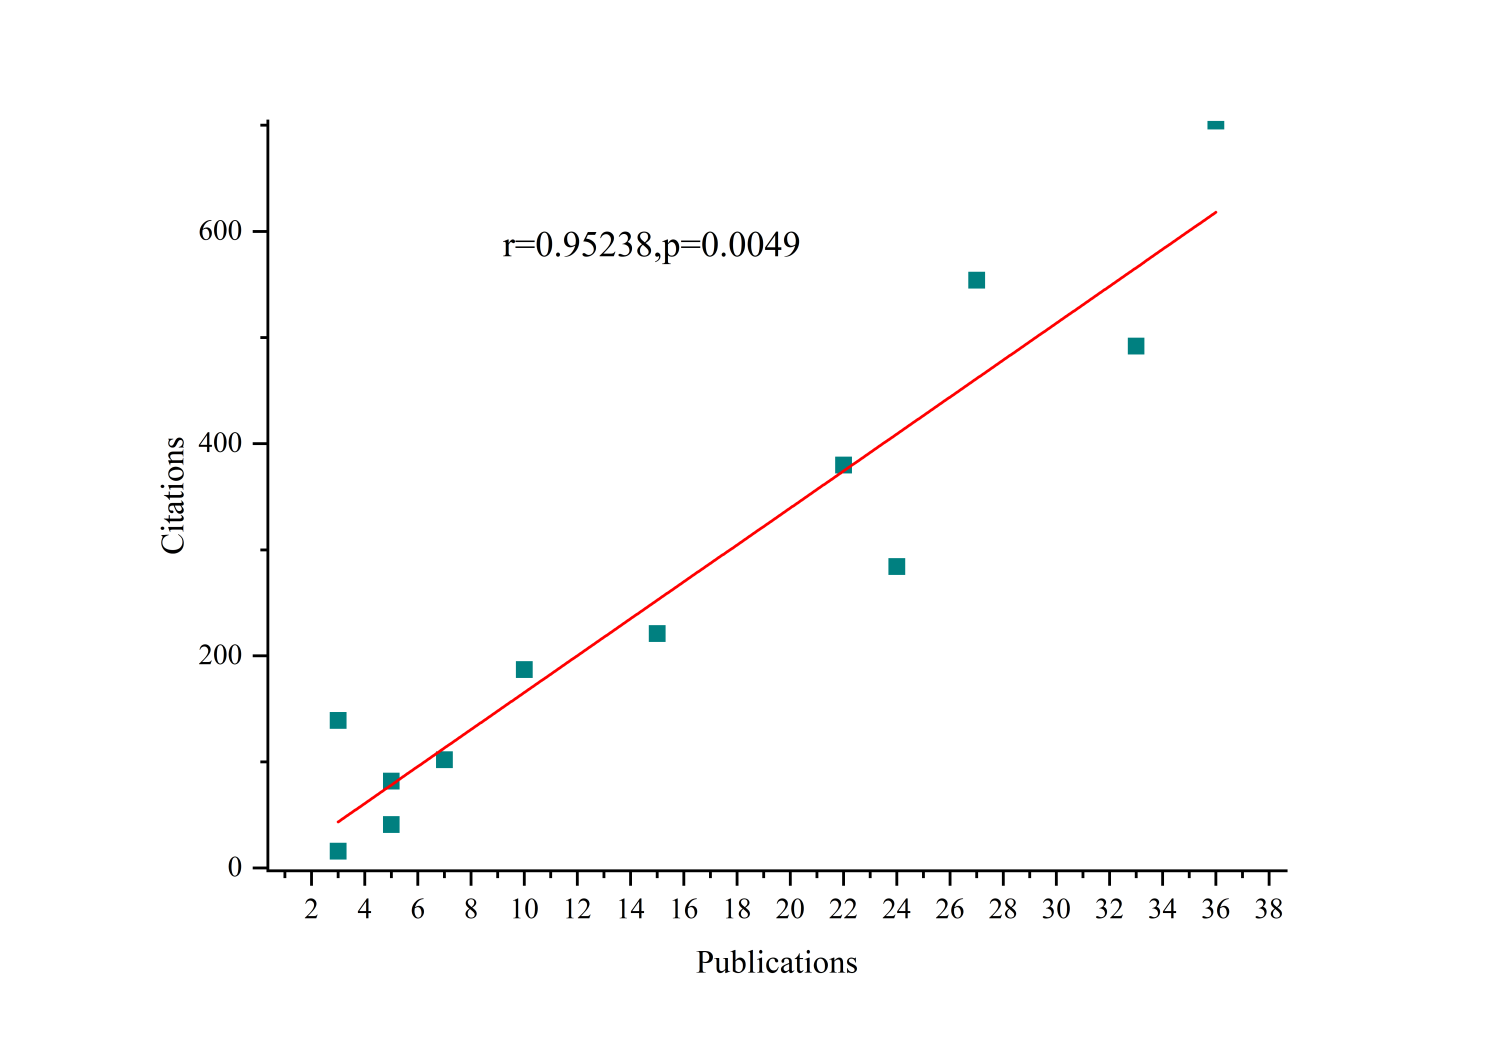


Supplementary Figure 1. Curve fitting of annual growth trend of publications from 2000 to 2024.

**
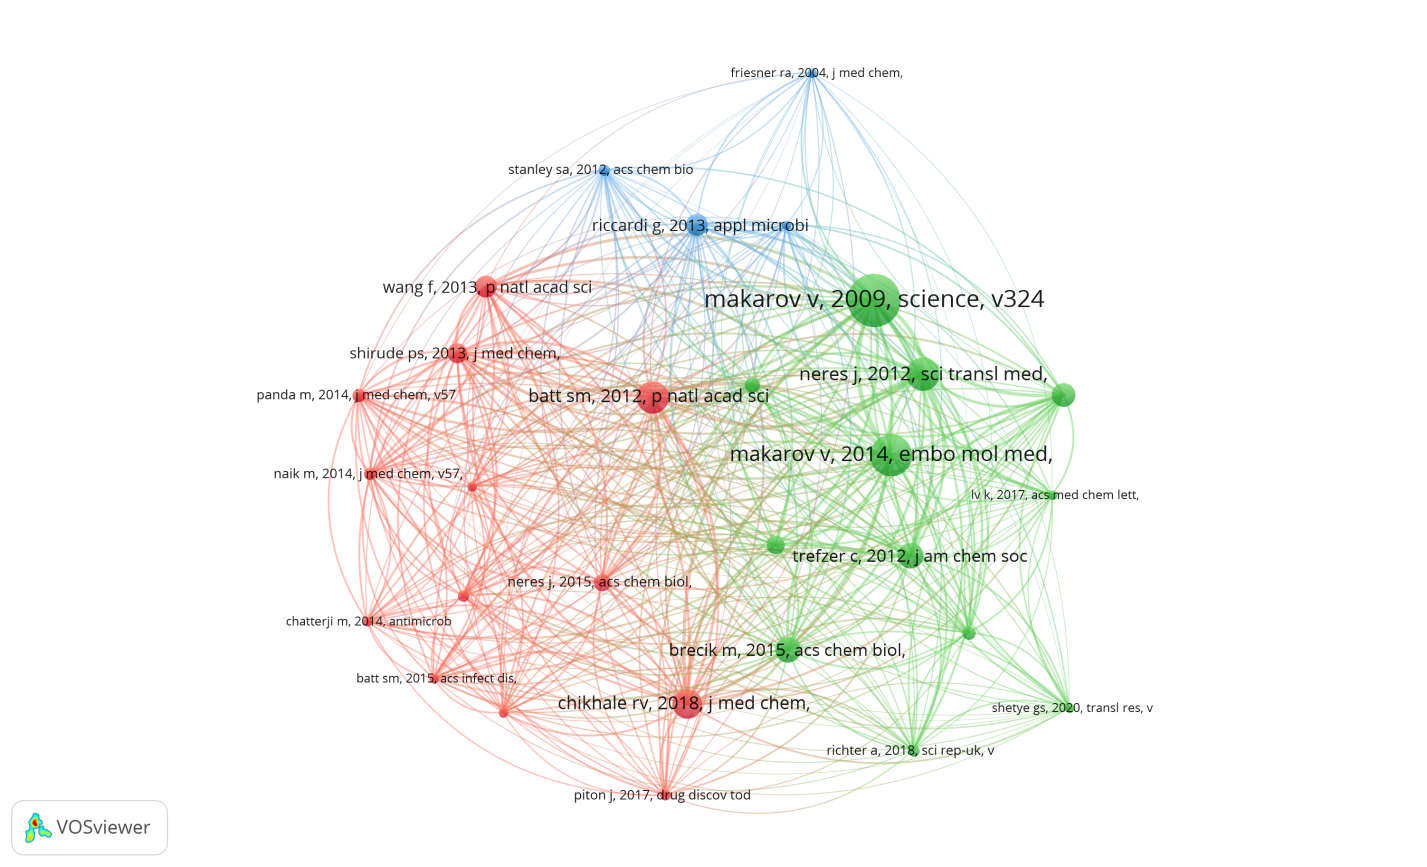

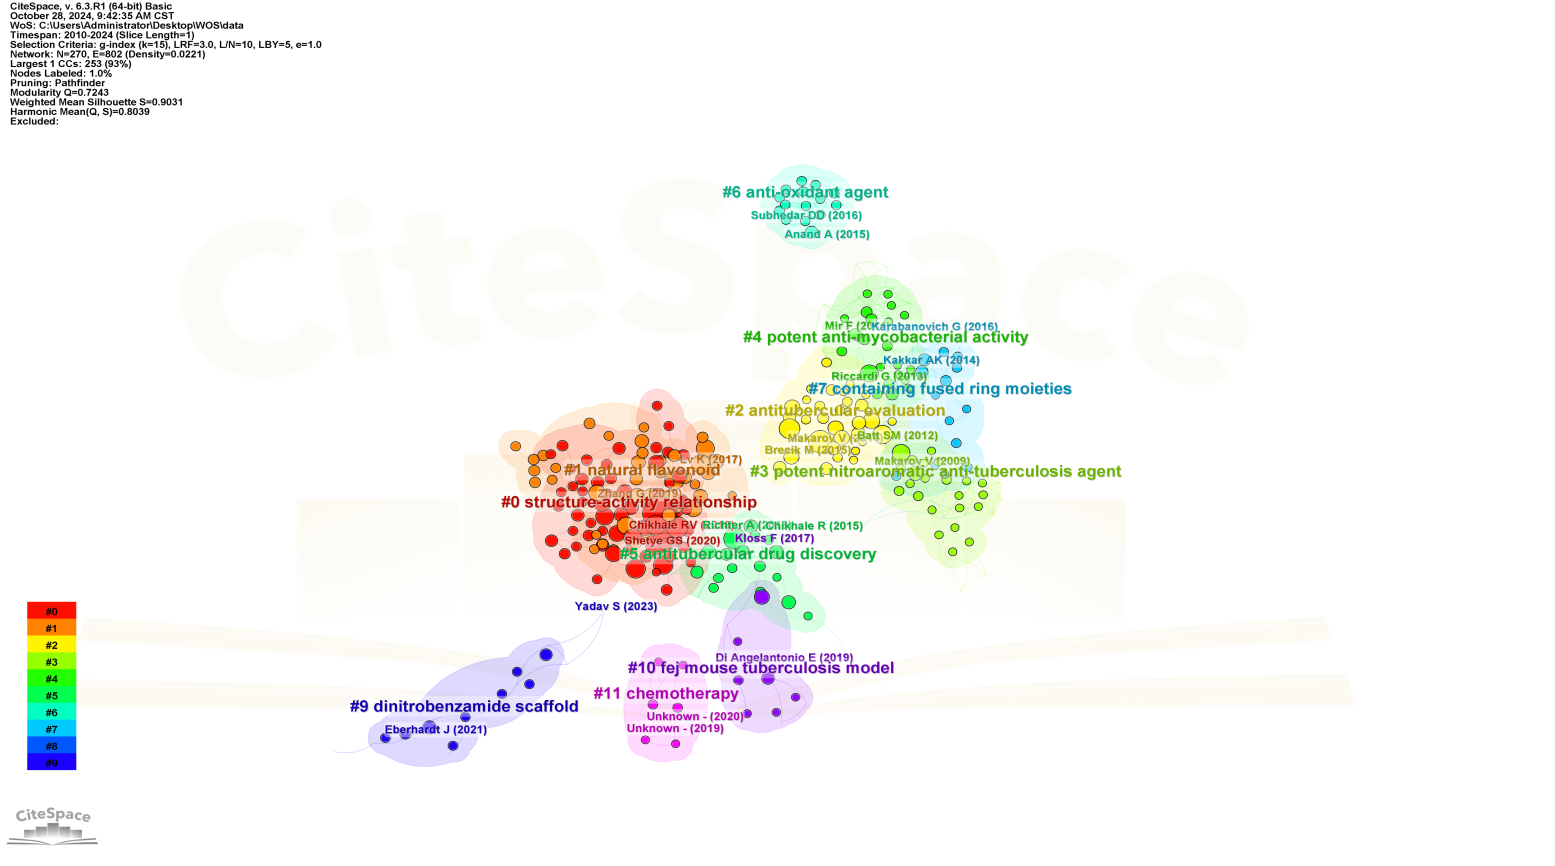
**

Supplementary Figure 2. Network visualization map of reference co-citation analysis generated by the CiteSpace. All the references are clustered into 11 clusters. From 2000 to 2022, the color changed from deep to light yellow.

## Supplementary Table 1 Top 17 Institutions with the Strongest Citation Bursts

| **Institutions** | **Year** | **Strength** | **Begin** | **End** | **2010 - 2024** |
| --- | --- | --- | --- | --- | --- |
| Swiss Federal Institutes of Technology Domain | 2010 | 2.75 | **2010** | 2016 | ▃▃▃▃▃▃▃▂▂▂▂▂▂▂▂ |
| Ecole Polytechnique Federale de Lausanne | 2010 | 2.6 | **2010** | 2016 | ▃▃▃▃▃▃▃▂▂▂▂▂▂▂▂ |
| AstraZeneca | 2013 | 3.14 | **2013** | 2016 | ▂▂▂▃▃▃▃▂▂▂▂▂▂▂▂ |
| University of Notre Dame | 2013 | 2.63 | **2013** | 2017 | ▂▂▂▃▃▃▃▃▂▂▂▂▂▂▂ |
| University of Illinois System | 2014 | 1.7 | **2014** | 2016 | ▂▂▂▂▃▃▃▂▂▂▂▂▂▂▂ |
| University of Illinois Chicago Hospital | 2014 | 1.7 | **2014** | 2016 | ▂▂▂▂▃▃▃▂▂▂▂▂▂▂▂ |
| University of Illinois Chicago | 2014 | 1.7 | **2014** | 2016 | ▂▂▂▂▃▃▃▂▂▂▂▂▂▂▂ |
| CSIR - National Chemical Laboratory (NCL) | 2015 | 2.78 | **2015** | 2019 | ▂▂▂▂▂▃▃▃▃▃▂▂▂▂▂ |
| Dr. Babasaheb Ambedkar Marathwada University (BAMU) | 2016 | 1.86 | **2016** | 2019 | ▂▂▂▂▂▂▃▃▃▃▂▂▂▂▂ |
| Peking Union Medical College | 2017 | 3.85 | **2017** | 2020 | ▂▂▂▂▂▂▂▃▃▃▃▂▂▂▂ |
| Institute of Medicinal Biotechnology - CAMS | 2017 | 2.77 | **2017** | 2020 | ▂▂▂▂▂▂▂▃▃▃▃▂▂▂▂ |
| Chinese Academy of Medical Sciences - Peking Union Medical College | 2017 | 2.4 | **2017** | 2020 | ▂▂▂▂▂▂▂▃▃▃▃▂▂▂▂ |
| University of Cape Town | 2018 | 1.69 | **2020** | 2021 | ▂▂▂▂▂▂▂▂▂▂▃▃▂▂▂ |
| Academy of Scientific & Innovative Research (AcSIR) | 2017 | 1.56 | **2021** | 2022 | ▂▂▂▂▂▂▂▂▂▂▂▃▃▂▂ |
| Max Planck Society | 2022 | 1.72 | **2022** | 2024 | ▂▂▂▂▂▂▂▂▂▂▂▂▃▃▃ |
| Martin Luther University Halle Wittenberg | 2022 | 1.7 | **2022** | 2022 | ▂▂▂▂▂▂▂▂▂▂▂▂▃▂▂ |
| Charles University Prague | 2016 | 1.41 | **2023** | 2024 | ▂▂▂▂▂▂▂▂▂▂▂▂▂▃▃ |
